# Supplementary material for: The association between gene variants and longitudinal structural brain changes in psychosis: a systematic review of longitudinal neuroimaging genetics studies
Source: PubMed Central journal article supplement (PMC5665946; doi:10.1038/s41537-017-0036-2), 2017-11-01
Supplement: 41537_2017_36_MOESM2_ESM.pdf [file 41537_2017_36_MOESM2_ESM.pdf]

**Supplementary Table 2: Categories used for the quality assessment of the studies included in the review**

| Category / range                        | 0            | 1                                  | 2        |
|-----------------------------------------|--------------|------------------------------------|----------|
| Funding sources                         | Not reported | -                                  | Reported |
| Sample size <sup>a</sup>                | <12          | 12-20                              | >20      |
| Inclusion criteria                      | Not reported | Partly reported                    | Reported |
| Exclusion criteria                      | Not reported | Partly reported                    | Reported |
| Control group                           | Not included | Included for genetic analysis only | Included |
| Gender                                  | Not reported | -                                  | Reported |
| Race /ethnic origin                     | Not reported |                                    | Reported |
| IQ/ educational level                   | Not reported | Parental education reported        | Reported |
| Duration of illness and/or age of onset | Not reported | -                                  | Reported |
| Treatment with antipsychotic medication | Not reported | -                                  | Reported |
| Drop-out rate                           | Not reported | -                                  | Reported |
| Statistical values reported             | Not reported | Mostly reported                    | Reported |
| Neuroimaging parameters <sup>b</sup>    | Not reported | Partly reported                    | Reported |
| Genetic analysis protocol               | Not reported | Partly reported                    | Reported |

Max 28. **High** (80-100%) >22, **moderate-high** (60-79%): 16.5-22, **moderate** (40-59%): 11-16.5, **moderate-low** (20-39%): 5.5-11, **low** (0-19%) <5.5

<sup>a</sup> Baseline sample size of patient genotype subgroups with both neuroimaging and genetic data available. One genotype group <12 + one genotype group >12 (0.5), one genotype group >20 + one genotype group 12-20 (1.5).

<sup>b</sup> Type of image, type of sequence, slice thickness, voxel size, NI software.
