# Supplementary material for: The association between gene variants and longitudinal structural brain changes in psychosis: a systematic review of longitudinal neuroimaging genetics studies
Source: PubMed Central journal article supplement (PMC5665946; doi:10.1038/s41537-017-0036-2), 2017-11-01
Supplement: 41537_2017_36_MOESM3_ESM.pdf [file 41537_2017_36_MOESM3_ESM.pdf]

**Supplementary Table 3: Quality assessment and rating of the studies included in the review**

| Author, Year                | Role of funding | Sample size | Inclusion criteria | Exclusion criteria | Control group | Gender | Race /ethnic origin | IQ/ educational level | DUI/ AAO | AP treatment | Drop-out rate | Statistical values reported | Neuroimaging parameters | Genetic Analysis Protocol | Sum of scores, category |
|-----------------------------|-----------------|-------------|--------------------|--------------------|---------------|--------|---------------------|-----------------------|----------|--------------|---------------|-----------------------------|-------------------------|---------------------------|-------------------------|
| Ho, 2007                    | 2               | 2           | 2                  | 0                  | 0             | 2      | 2                   | 2                     | 2        | 2            | 2             | 2                           | 2                       | 2                         | 24, High                |
| Koolschijn, 2010            | 0               | 2           | 2                  | 1                  | 2             | 2      | 2                   | 1                     | 2        | 2            | 2             | 2                           | 2                       | 2                         | 24, High                |
| Smith, 2012                 | 2               | 2           | 2                  | 2                  | 2             | 2      | 2                   | 2                     | 2        | 2            | 2             | 2                           | 2                       | 2                         | 28, High                |
| Suárez-Pinilla, 2013        | 2               | 1.5         | 2                  | 2                  | 2             | 2      | 2                   | 0                     | 2        | 2            | 2             | 2                           | 2                       | 2                         | 23.5, High              |
| Addington, 2007             | 0               | 2           | 2                  | 1                  | 2             | 2      | 2                   | 2                     | 0        | 0            | 2             | 2                           | 1                       | 2                         | 20, Moderate-high       |
| Suárez-Pinilla, 2015 (NRG1) | 2               | 2           | 2                  | 2                  | 2             | 2      | 2                   | 0                     | 2        | 2            | 2             | 2                           | 2                       | 2                         | 26, High                |
| Vázquez-Bourgon, 2015       | 2               | 1           | 2                  | 2                  | 0             | 2      | 2                   | 0                     | 2        | 2            | 2             | 1                           | 2                       | 2                         | 22, Moderate-high       |
| Suárez-Pinilla, 2015 (CNR1) | 2               | 1.5         | 2                  | 2                  | 1             | 2      | 2                   | 0                     | 2        | 2            | 2             | 2                           | 2                       | 2                         | 24.5, High              |
| Addington, 2005             | 0               | 2           | 2                  | 1                  | 0             | 2      | 2                   | 2                     | 2        | 0            | 2             | 2                           | 1                       | 2                         | 20, Moderate-high       |
| Hartz, 2010                 | 2               | 1.5         | 2                  | 0                  | 1             | 2      | 2                   | 0                     | 2        | 2            | 2             | 1                           | 2                       | 2                         | 21.5, Moderate-high     |
| Raznahan, 2011              | 2               | 1.5         | 2                  | 2                  | 2             | 2      | 2                   | 2                     | 0        | 0            | 2             | 2                           | 1                       | 2                         | 22.5, High              |

*Abbreviations: AAO, age at onset; AP, antipsychotic; DUI, duration of untreated illness; IQ, intelligence quotient.*
